# Supplementary material for: Intra-epidemic evolutionary dynamics of a Dengue virus type 1 population reveal mutant spectra that correlate with disease transmission
Source: PubMed Central journal article supplement (PMC4778070; doi:10.1038/srep22592), 2016-03-04
Supplement: srep22592-s1.pdf [file srep22592-s1.pdf]

**Intra-epidemic evolutionary dynamics of a Dengue virus type 1 population reveal mutant spectra that correlate with disease transmission**

Hapuarachchige Chanditha Hapuarachchi<sup>\*</sup>, Carmen Koo, Relus Kek, Helen Xu, Yee Ling Lai, Lilac Liu, Suet Yheng Kok, Yuan Shi, Raphael Lee Tze Chuen, Kim-Sung Lee, Sebastian Maurer-Stroh, Lee Ching Ng

<sup>\*</sup>Corresponding author

**Supplementary Table S1.** Summary of the number of samples screened and typed for DENV serotypes and the number of DENV-1 strains sequenced during the study period

| Period         | Total No. of sera screened for dengue* | No. of NS1 positive sera | No. of samples serotyped |                  | No. of DENV-1 positive s | No. of DENV-1 envelope genes sequenced | No. of envelope gene sequences of DENV-1 genotype III (epidemic lineage) | No. of DENV-1 genotype III (epidemic lineage) full genomes sequenced |
|----------------|----------------------------------------|--------------------------|--------------------------|------------------|--------------------------|----------------------------------------|--------------------------------------------------------------------------|----------------------------------------------------------------------|
|                |                                        |                          | Real-time PCR            | Conventional PCR |                          |                                        |                                                                          |                                                                      |
| 2012 (Nov-Dec) | 271                                    | 26                       | 18                       | 6                | 8                        | 8                                      | 8                                                                        | 1                                                                    |
| 2013 (Jan-Dec) | 5742                                   | 1540                     | 1243                     | 178              | 820                      | 728                                    | 626                                                                      | 50                                                                   |
| 2014 (Jan-May) | 1931                                   | 618                      | 531                      | 50               | 517                      | 452                                    | 424                                                                      | 32                                                                   |
| Total          | 7944                                   | 2184                     | 1792                     | 234              | 1345                     | 1188                                   | 1058                                                                     | 83                                                                   |

\* Patient sera were screened by using the SD Bioline Dengue Duo kit (Standard Diagnostics INC., South Korea). The combo kit tests for the presence of both DENV NS1 antigen and IgM/IgG antibodies in a single assay. Only the sera received with patient consent are shown.

**Supplementary Table S2.** Amplification protocol and primers used for whole genome sequencing of DENV-1.

| <b>Fragment</b> | <b>Primer Name</b> | <b>Sequence (5' - 3')</b> |
|-----------------|--------------------|---------------------------|
| Fragment 1      | Den1-10FN*         | TCTACGTGGACCGACAAGAAC     |
|                 | Den1-552F          | TGGATTTGGGAGAGTTWTGTGAG   |
|                 | Den1-1102F         | CGYAAACTGTGCATTGAAGC      |
|                 | Den1-500R          | ACTTTCCTCTTTCCTGCTTGC     |
|                 | Den1-986R          | CTCCTGACAGTCCTTCMACG      |
|                 | Den1-1472R         | GCTCCGTAGTCRGTCAGCT       |
|                 | Den1-1949R*        | CATGGTGCATCTGTTCCTTC      |
| Fragment 2      | Den1-1668F*        | CGAAGAAGCAGGAAGTAGTCG     |
|                 | Den1-2109F         | TCAAGAAAGGAAGYAGCATAGG    |
|                 | Den1-2869F         | GAACATTTGGGAAGTTGAGGA     |
|                 | Den1-2986R         | CTTGATRGCAGCTGACATTAGC    |
|                 | Den1-2509R         | CTCTGTCCAAGTGTGRACTTCA    |
|                 | Den1-3568R*        | TTCTACTCCATCTGGAYCTCA     |
| Fragment 3      | Den1-3272F*        | GTYGTTGTGGATGAACATTGTGG   |
|                 | Den1-3710F         | GCCACTTTYAGAATGAGACC      |
|                 | Den1-4310F         | TGGGAAGAAGAAGCAGAACAC     |
|                 | Den1-4758F         | ATATGGAGGAGGTTGGAGG       |

|            |              |                            |
|------------|--------------|----------------------------|
|            | Den1-4097R   | GAAACATGGTTAGTGGTTTGC      |
|            | Den1-4587R   | TAGATACCATCATCAAGAACTGC    |
|            | Den1-5166R*  | CTCACGGACTATGGCTGGRAG      |
| Fragment 4 | Den1-4871F*  | ACYCCTGAAGGCGAAGTTGG       |
|            | Den1-5361F   | TGATYATCATGGATGAAGCACA     |
|            | Den1-5895F   | GAGGAAGAATTGGAAGGAACCA     |
|            | Den1-6367F   | AGGRAGAAGAAGTGTCTCAGGTGA   |
|            | Den1-6486R   | CTTGTTCCGARTTGTGCAACA      |
|            | Den1-5928R   | G TTCCTTCCAATTCTTCCTCTRCTC |
|            | Den1-5550R   | GAATGTCTCTTTCCTCATCTTGGAT  |
|            | Den1-6954R*  | GCATAGAGRGTCCAGGCTGAAG     |
| Fragment 5 | Den1-6813FN* | TGACAGTRGCAGCCAATGAG       |
|            | Den1-7377F   | CTCTTGATGCGGACYACATGG      |
|            | Den1-7820F   | GTGGAAGAGGTGGCTGGTCA       |
|            | Den1-8441F   | CAACATGGCATTATGATGAGGAC    |
|            | Den1-8851R   | CACTGCTTCTTTTGCTGAGTTCC    |
|            | Den1-8261R   | GACACAATGTTTCCTGTTCCACA    |
|            | Den1-7751R   | GTCCTCTCGACACTGCATGT       |
|            | Den1-7098R   | CCTATGTCCATCTTCGATATTGGC   |
|            | Den1-9372R*  | CCTCTYTGGTCACGTCTGGATA     |

|            |              |                          |
|------------|--------------|--------------------------|
| Fragment 6 | Den1-8984F*  | GGRAGTCGTGCAATATGGTACA   |
|            | Den1-9352F   | ATCCAGACGTGACCAGAGAG     |
|            | Den1-9754F   | ATGCCGCAACCAAGATGAAC     |
|            | Den1-10217F  | TACATGACATCAATGAAGAGATTC |
|            | Den1-9418R   | CATGTTGGTGAAAGTTTTAAGCC  |
|            | Den1-10031R  | CCTCTATCCAAACCCTATTCCA   |
|            | Den1-10694R* | GTGCCTGGAATGATGCTGTAGA   |

Amplification primers are denoted by asterisks. The remaining primers, together with amplification primers were used for sequencing.

### Amplification protocol

| PCR conditions - Fragments 1 - 2 |          |       |
|----------------------------------|----------|-------|
| Temperature °C                   | Time     | Cycle |
| 98 °C                            | 10 sec   | 1     |
| 98 °C                            | 5 sec    | 35    |
| 60 °C                            | 10 sec   |       |
| 72 °C                            | 30 sec   |       |
| 72 °C                            | 2 min    | 1     |
| 20 °C                            | infinity | 1     |

| <b>PCR conditions - Fragments 3 - 6</b> |             |              |
|-----------------------------------------|-------------|--------------|
| <b>Temperature °C</b>                   | <b>Time</b> | <b>Cycle</b> |
| 98 °C                                   | 10 sec      | 1            |
| 98 °C                                   | 5 sec       | 35           |
| 65 °C                                   | 10 sec      |              |
| 72 °C                                   | 45 sec      |              |
| 72 °C                                   | 2 min       | 1            |
| 20 °C                                   | infinity    | 1            |

Each fragment was PCR amplified by using 0.5  $\mu$ M of fragment-specific primers and 1X Phusion<sup>TM</sup> Flash High-Fidelity PCR Master Mix (Thermo Fisher Scientific, MA, USA).

**Supplementary Table S3.** Summary of the number of DENV-1 sequences used in each analysis

| <b>Type of analysis</b>                                                         | <b>No. of study sequences used</b> | <b>Remarks</b>                                                                                                                                                                                                                                         |
|---------------------------------------------------------------------------------|------------------------------------|--------------------------------------------------------------------------------------------------------------------------------------------------------------------------------------------------------------------------------------------------------|
| <b>Based on envelope (<i>E</i>) gene sequences included in the study(n=744)</b> |                                    |                                                                                                                                                                                                                                                        |
| Definition of mutant spectra                                                    | 744                                | The number of sequences of each variant mapped is indicated in Figure 1 legend                                                                                                                                                                         |
| Calculation of p-distance                                                       | 744                                | None                                                                                                                                                                                                                                                   |
| Median joining network analysis                                                 | 715                                | Variant 13.03 (n=29) was not included in the analysis as the whole genome analysis revealed that variants 13.04-13.13 did not originate from 13.03                                                                                                     |
| Spatial analysis using Geographical Information System                          | 668                                | <p>DENV-1 <i>E</i> gene sequences</p> <p>Of 744 sequences included in the study, the location (postal code) information was available only for 668 sequences</p> <p>The number of sequences of each variant mapped is indicated in Figure 4 legend</p> |
| Calculation of mean substitution rate                                           | 291                                | <i>E</i> gene sequences were selected from 744 total sequences to represent each variant on a weekly basis from November 2012 to May 2014                                                                                                              |

|                                                                         |     |                                                                                                                                           |
|-------------------------------------------------------------------------|-----|-------------------------------------------------------------------------------------------------------------------------------------------|
| Bayesian skyline plot analysis                                          | 291 | <i>E</i> gene sequences were selected from 744 total sequences to represent each variant on a weekly basis from November 2012 to May 2014 |
| <b>Based on whole polyprotein sequences included in the study(n=83)</b> |     |                                                                                                                                           |
| Prediction of structural implications and immune interactions           | 83  | None                                                                                                                                      |
| Selection pressure analysis                                             | 83  | Additional 81 DENV-1 whole polyprotein sequences retrieved from GenBank were also included in the analysis                                |
| Construction of maximum clade credibility tree                          | 36  | DENV-1 whole polyprotein sequences<br><br>The analysis also included 52 DENV-1 polyprotein sequences retrieved from the GenBank           |
| Calculation of tMRCA                                                    | 36  | DENV-1 whole polyprotein sequences<br><br>The analysis also included 52 DENV-1 polyprotein sequences retrieved from the GenBank           |

**Supplementary Video S1. Temporo-spatial distribution pattern of DENV-1 genotype III variants and total dengue cases.** The video demonstrates the emergence and distribution of variants of the epidemic lineage on a weekly scale during the study period from November 2012 to May 2014. Each variant is colour-coded as shown in the figure legend. The coordinates of reported locations of 668 epidemic lineage strains were mapped and displayed in a video format



using R software package version 2.15.0 (<http://www.R-project.org/>)<sup>59</sup>. The distribution of total number of dengue cases has been shown in a density gradient (grey) as described in Figure 4.
